# Supplementary material for: H-migration in peroxy radicals under atmospheric conditions
Source: Copernicus journal article supplement (doi:10.5194/acp-2019-1164), 2020-02-26
Supplement: Supplementary file 1 [file acp-2019-1164-supplement.zip]

## Aliphatic RO2

360  
375  
400

[illegible]

**Fig. 28**

Figure 28 displays the average temperature dependence of the ratio of the cross-sections of the reaction  $\text{CH}_2\text{O} + \text{CH}_2\text{O} \rightarrow \text{CH}_2\text{O} + \text{CH}_2\text{O}$  for different values of the parameter  $n$ . The figure is organized into a grid of 12 subplots, each corresponding to a specific value of  $n$  (1.0, 1.5, 2.0, 3.0, 4.0, 5.0, 6.0, 7.0, 8.0). Each subplot includes a table of calculated data points and a graph showing the ratio of cross-sections as a function of temperature (from 200 to 500 K). The data points are represented by open circles, and the solid lines represent the calculated curves. The plots demonstrate that the ratio of cross-sections generally increases with temperature and decreases as the parameter  $n$  increases.

Pict no-02R=

Figure 1 is a log-linear plot showing the relationship between the number of iterations (x-axis) and the error (y-axis). The x-axis ranges from 2.00 to 5.00, and the y-axis is on a logarithmic scale ranging from  $1.00 \times 10^{-8}$  to  $1.00 \times 10^{-1}$ . The plot shows a straight line with a negative slope, indicating that the error decreases exponentially as the number of iterations increases.



Unsaturated RO2 with endo-cyclic double bond

For endo-C2R-C

1.5 Hahn

| Average temperature dependence |                                         |          |          |          | Endo-H            |          |          |            |          |
|--------------------------------|-----------------------------------------|----------|----------|----------|-------------------|----------|----------|------------|----------|
| T                              | CHOO (C-CH=CHO) (C-CH=CHO) (C=O=O)) (CH |          |          |          | TemperatureTarget | Pinv     | Endo-H   | LT         | Prekcalc |
| 220                            | 1.08E-07                                | 1.38E-04 | 4.38E-03 | 1.38E-01 | 1.08E-07          | 1.38E-04 | 4.38E-03 | 1.38E-01   | 1.08E-07 |
| 225                            | 8.03E-07                                | 9.21E-04 | 4.06E-03 | 1.06E-01 | 5.93E-06          | 9.09E-04 | 4.06E-03 | 1.06E-01   | 8.03E-07 |
| 230                            | 7.08E-06                                | 7.46E-03 | 3.13E-02 | 1.06E-01 | 4.13E-04          | 7.46E-03 | 3.13E-02 | 1.06E-01   | 7.08E-06 |
| 235                            | 1.83E-05                                | 4.73E-02 | 4.43E-02 | 1.38E-01 | 3.33E-04          | 9.04E-04 | 4.43E-02 | 1.38E-01   | 1.83E-05 |
| 237                            | 4.28E-06                                | 8.03E-02 | 3.13E-02 | 1.38E-01 | 2.68E-04          | 2.68E-04 | 3.13E-02 | 1.38E-01   | 4.28E-06 |
| 240                            | 2.93E-06                                | 3.20E-02 | 1.14E-01 | 1.06E-01 | 1.83E-03          | 8.04E-03 | 1.14E-01 | 1.06E-01   | 2.93E-06 |
| 245                            | 2.13E-05                                | 2.13E-01 | 1.78E-01 | 1.06E-01 | 1.29E-02          | 1.29E-02 | 1.78E-01 | 1.06E-01   | 2.13E-05 |
| 330                            | 1.14E-01                                | 1.14E-01 | 1.90E-01 | 1.77E-02 | 3.73E-02          | 3.73E-02 | 1.90E-01 | 1.77E-02   | 1.14E-01 |
| 335                            | 5.43E-01                                | 3.98E-01 | 6.08E-01 | 7.43E-02 | 1.49E-01          | 1.49E-01 | 6.08E-01 | 7.43E-02   | 5.43E-01 |
| 340                            | 3.14E-01                                | 1.23E-01 | 1.22E-01 | 1.78E-01 | 2.81E-01          | 2.81E-01 | 1.23E-01 | 1.78E-01   | 3.14E-01 |
| 345                            | 2.13E-01                                | 1.38E-01 | 1.22E-01 | 1.78E-01 | 2.81E-01          | 2.81E-01 | 1.38E-01 | 1.78E-01   | 2.13E-01 |
| 375                            | 1.44E-01                                | 6.05E-01 | 9.22E-01 | 1.38E-01 | 1.37E-01          | 2.87E-01 | 6.05E-01 | 9.22E-01   | 1.44E-01 |
| 380                            | 1.73E-01                                | 2.73E-01 | 1.95E-01 | 1.38E-01 | 1.29E-01          | 2.87E-01 | 2.73E-01 | 1.95E-01   | 1.73E-01 |
| 425                            | 6.23E-01                                | 1.05E-02 | 1.13E-01 | 1.23E-01 | 1.58E-01          | 1.58E-01 | 1.05E-02 | 1.23E-01   | 6.23E-01 |
| 430                            | 2.05E-01                                | 4.43E-02 | 1.51E-01 | 1.66E-01 | 2.46E-01          | 2.46E-01 | 4.43E-02 | 1.66E-01   | 2.05E-01 |
| CHOO (C-CH=CHO                 |                                         |          |          |          | Endo-H            |          |          |            |          |
| P1                             | 1.1948E-06                              |          |          |          | TemperatureTarget | Pinv     | Endo-H   | LT         | Prekcalc |
| P2                             | 3.0133E-05                              |          |          |          | 2.02E+02          | 5.00     | 1.00E-01 | 1.00E-01   | 1.00E-01 |
| 220                            | 7.08E-06                                | 1.06E-07 | 1.06E-07 | 1.06E-01 | 1.06E-07          | 1.06E-07 | 1.06E-07 | 1.06E-01   | 7.08E-06 |
| 225                            | 8.03E-07                                | 1.20E-07 | 1.20E-07 | 1.06E-01 | 2.06E-07          | 2.06E-07 | 1.20E-07 | 1.06E-01   | 8.03E-07 |
| 230                            | 7.08E-06                                | 1.06E-07 | 1.06E-07 | 1.06E-01 | 7.08E-06          | 7.08E-06 | 1.06E-07 | 1.06E-01   | 7.08E-06 |
| 235                            | 1.83E-05                                | 4.73E-07 | 4.73E-07 | 1.38E-01 | 1.83E-05          | 6.12E-06 | 4.73E-07 | 1.38E-01   | 1.83E-05 |
| 237                            | 4.28E-06                                | 3.20E-07 | 3.20E-07 | 1.38E-01 | 4.28E-06          | 1.29E-06 | 3.20E-07 | 1.38E-01   | 4.28E-06 |
| 240                            | 2.93E-06                                | 2.93E-07 | 2.93E-07 | 1.06E-01 | 2.93E-06          | 2.93E-06 | 2.93E-07 | 1.06E-01   | 2.93E-06 |
| 245                            | 2.13E-05                                | 6.02E-07 | 6.02E-07 | 1.06E-01 | 2.13E-05          | 1.79E-04 | 6.02E-07 | 1.06E-01   | 2.13E-05 |
| 330                            | 1.14E-01                                | 2.45E-04 | 2.45E-04 | 1.77E-02 | 1.14E-01          | 4.96E-04 | 2.45E-04 | 1.77E-02   | 1.14E-01 |
| 335                            | 5.43E-01                                | 6.08E-04 | 6.08E-04 | 7.43E-02 | 5.43E-01          | 2.36E-03 | 6.08E-04 | 7.43E-02   | 5.43E-01 |
| 340                            | 3.14E-01                                | 1.44E-03 | 1.44E-03 | 1.78E-01 | 3.14E-01          | 5.03E-03 | 1.44E-03 | 1.78E-01   | 3.14E-01 |
| 345                            | 2.13E-01                                | 1.66E-03 | 1.66E-03 | 1.78E-01 | 2.13E-01          | 5.03E-03 | 1.66E-03 | 1.78E-01   | 2.13E-01 |
| 375                            | 1.44E-01                                | 7.44E-02 | 7.44E-02 | 1.38E-01 | 1.44E-01          | 4.84E-02 | 7.44E-02 | 1.38E-01   | 1.44E-01 |
| 380                            | 1.73E-01                                | 4.14E-02 | 4.14E-02 | 1.38E-01 | 1.73E-01          | 4.09E-02 | 4.14E-02 | 1.38E-01   | 1.73E-01 |
| 425                            | 6.23E-01                                | 1.98E-01 | 1.98E-01 | 1.23E-01 | 6.23E-01          | 1.42E-01 | 1.98E-01 | 1.23E-01   | 6.23E-01 |
| 430                            | 2.05E-01                                | 7.44E-01 | 7.44E-01 | 1.66E-01 | 2.05E-01          | 1.09E-01 | 7.44E-01 | 1.66E-01   | 2.05E-01 |
| CHOO (C-CH=CHO                 |                                         |          |          |          | Endo-H            |          |          |            |          |
| P1                             | 1.2644E-06                              |          |          |          | TemperatureTarget | Pinv     | Endo-H   | LT         | Prekcalc |
| P2                             | 3.4796E-05                              |          |          |          | 2.02E+02          | 5.00     | 1.00E-01 | 1.00E-01   | 1.00E-01 |
| 220                            | 6.12E-06                                | 8.79E-07 | 8.79E-07 | 1.06E-01 | 6.12E-06          | 6.12E-06 | 8.79E-07 | 1.06E-01   | 6.12E-06 |
| 225                            | 5.14E-06                                | 4.73E-07 | 4.73E-07 | 1.06E-01 | 5.14E-06          | 1.26E-06 | 4.73E-07 | 1.06E-01   | 5.14E-06 |
| 230                            | 4.28E-06                                | 1.06E-07 | 1.06E-07 | 1.06E-01 | 4.28E-06          | 3.23E-06 | 1.06E-07 | 1.06E-01   | 4.28E-06 |
| 235                            | 1.83E-05                                | 4.73E-07 | 4.73E-07 | 1.38E-01 | 1.83E-05          | 2.46E-06 | 4.73E-07 | 1.38E-01   | 1.83E-05 |
| 237                            | 4.28E-06                                | 3.20E-07 | 3.20E-07 | 1.38E-01 | 4.28E-06          | 2.46E-06 | 3.20E-07 | 1.38E-01   | 4.28E-06 |
| 240                            | 2.93E-06                                | 2.93E-07 | 2.93E-07 | 1.06E-01 | 2.93E-06          | 1.06E-07 | 2.93E-07 | 1.06E-01   | 2.93E-06 |
| 245                            | 2.13E-05                                | 6.02E-07 | 6.02E-07 | 1.06E-01 | 2.13E-05          | 1.84E-07 | 6.02E-07 | 1.06E-01   | 2.13E-05 |
| 330                            | 1.14E-01                                | 2.07E-02 | 2.07E-02 | 1.77E-02 | 1.14E-01          | 4.13E-02 | 2.07E-02 | 1.77E-02   | 1.14E-01 |
| 335                            | 5.43E-01                                | 1.20E-01 | 1.20E-01 | 7.43E-02 | 5.43E-01          | 1.34E-01 | 1.20E-01 | 7.43E-02   | 5.43E-01 |
| 340                            | 3.14E-01                                | 1.20E-01 | 1.20E-01 | 1.78E-01 | 3.14E-01          | 2.81E-01 | 1.20E-01 | 1.78E-01   | 3.14E-01 |
| 345                            | 2.13E-01                                | 1.20E-01 | 1.20E-01 | 1.78E-01 | 2.13E-01          | 2.81E-01 | 1.20E-01 | 1.78E-01   | 2.13E-01 |
| 375                            | 1.44E-01                                | 3.18E-01 | 3.18E-01 | 1.38E-01 | 1.44E-01          | 6.09E-01 | 3.18E-01 | 1.38E-01   | 1.44E-01 |
| 380                            | 1.73E-01                                | 1.48E-01 | 1.48E-01 | 1.38E-01 | 1.73E-01          | 1.17E-01 | 1.48E-01 | 1.38E-01   | 1.73E-01 |
| 425                            | 6.23E-01                                | 5.09E-01 | 5.09E-01 | 1.23E-01 | 6.23E-01          | 5.09E-01 | 5.09E-01 | 1.23E-01   | 6.23E-01 |
| 430                            | 2.05E-01                                | 1.48E-02 | 1.48E-02 | 1.66E-01 | 2.05E-01          | 2.09E-02 | 1.48E-02 | 1.66E-01   | 2.05E-01 |
| CHOO (C-CH=CHO                 |                                         |          |          |          | Endo-H            |          |          |            |          |
| P1                             | 1.2644E-06                              |          |          |          | TemperatureTarget | Pinv     | Endo-H   | LT         | Prekcalc |
| P2                             | 3.4796E-05                              |          |          |          | 2.02E+02          | 5.00     | 1.00E-01 | 1.00E-01   | 1.00E-01 |
| 220                            | 6.12E-06                                | 8.79E-07 | 8.79E-07 | 1.06E-01 | 6.12E-06          | 6.12E-06 | 8.79E-07 | 1.06E-01   | 6.12E-06 |
| 225                            | 5.14E-06                                | 4.73E-07 | 4.73E-07 | 1.06E-01 | 5.14E-06          | 1.26E-06 | 4.73E-07 | 1.06E-01   | 5.14E-06 |
| 230                            | 4.28E-06                                | 1.06E-07 | 1.06E-07 | 1.06E-01 | 4.28E-06          | 3.23E-06 | 1.06E-07 | 1.06E-01   | 4.28E-06 |
| 235                            | 1.83E-05                                | 4.73E-07 | 4.73E-07 | 1.38E-01 | 1.83E-05          | 2.46E-06 | 4.73E-07 | 1.38E-01   | 1.83E-05 |
| 237                            | 4.28E-06                                | 3.20E-07 | 3.20E-07 | 1.38E-01 | 4.28E-06          | 2.46E-06 | 3.20E-07 | 1.38E-01   | 4.28E-06 |
| 240                            | 2.93E-06                                | 2.93E-07 | 2.93E-07 | 1.06E-01 | 2.93E-06          | 1.06E-07 | 2.93E-07 | 1.06E-01   | 2.93E-06 |
| 245                            | 2.13E-05                                | 6.02E-07 | 6.02E-07 | 1.06E-01 | 2.13E-05          | 1.84E-07 | 6.02E-07 | 1.06E-01   | 2.13E-05 |
| 330                            | 1.14E-01                                | 1.20E-01 | 1.20E-01 | 1.77E-02 | 1.14E-01          | 4.13E-02 | 1.20E-01 | 1.77E-02   | 1.14E-01 |
| 335                            | 5.43E-01                                | 1.20E-01 | 1.20E-01 | 7.43E-02 | 5.43E-01          | 1.34E-01 | 1.20E-01 | 7.43E-02   | 5.43E-01 |
| 340                            | 3.14E-01                                | 1.20E-01 | 1.20E-01 | 1.78E-01 | 3.14E-01          | 2.81E-01 | 1.20E-01 | 1.78E-01   | 3.14E-01 |
| 345                            | 2.13E-01                                | 1.20E-01 | 1.20E-01 | 1.78E-01 | 2.13E-01          | 2.81E-01 | 1.20E-01 | 1.78E-01   | 2.13E-01 |
| 375                            | 1.44E-01                                | 3.18E-01 | 3.18E-01 | 1.38E-01 | 1.44E-01          | 6.09E-01 | 3.18E-01 | 1.38E-01   | 1.44E-01 |
| 380                            | 1.73E-01                                | 1.48E-01 | 1.48E-01 | 1.38E-01 | 1.73E-01          | 1.17E-01 | 1.48E-01 | 1.38E-01   | 1.73E-01 |
| 425                            | 6.23E-01                                | 5.09E-01 | 5.09E-01 | 1.23E-01 | 6.23E-01          | 5.09E-01 | 5.09E-01 | 1.23E-01   | 6.23E-01 |
| 430                            | 2.05E-01                                | 1.48E-02 | 1.48E-02 | 1.66E-01 | 2.05E-01          | 2.09E-02 | 1.48E-02 | 1.66E-01   | 2.05E-01 |
| CHOO (C-CH=CHO                 |                                         |          |          |          | Endo-H            |          |          |            |          |
| P1                             | 1.2644E-06                              |          |          |          | TemperatureTarget | Pinv     | Endo-H   | LT         | Prekcalc |
| P2                             | 3.4796E-05                              |          |          |          | 2.02E+02          | 5.00     | 1.00E-01 | 1.00E-01   | 1.00E-01 |
| 220                            | 6.12E-06                                | 8.79E-07 | 8.79E-07 | 1.06E-01 | 6.12E-06          | 6.12E-06 | 8.79E-07 | 1.06E-01   | 6.12E-06 |
| 225                            | 5.14E-06                                | 4.73E-07 | 4.73E-07 | 1.06E-01 | 5.14E-06          | 1.26E-06 | 4.73E-07 | 1.06E-01   | 5.14E-06 |
| 230                            | 4.28E-06                                | 1.06E-07 | 1.06E-07 | 1.06E-01 | 4.28E-06          | 3.23E-06 | 1.06E-07 | 1.06E-01   | 4.28E-06 |
| 235                            | 1.83E-05                                | 4.73E-07 | 4.73E-07 | 1.38E-01 | 1.83E-05          | 2.46E-06 | 4.73E-07 | 1.38E-01   | 1.83E-05 |
| 237                            | 4.28E-06                                | 3.20E-07 | 3.20E-07 | 1.38E-01 | 4.28E-06          | 2.46E-06 | 3.20E-07 | 1.38E-01   | 4.28E-06 |
| 240                            | 2.93E-06                                | 2.93E-07 | 2.93E-07 | 1.06E-01 | 2.93E-06          | 1.06E-07 | 2.93E-07 | 1.06E-01   | 2.93E-06 |
| 245                            | 2.13E-05                                | 6.02E-07 | 6.02E-07 | 1.06E-01 | 2.13E-05          | 1.84E-07 | 6.02E-07 | 1.06E-01   | 2.13E-05 |
| 330                            | 1.14E-01                                | 1.20E-01 | 1.20E-01 | 1.77E-02 | 1.14E-01          | 4.13E-02 | 1.20E-01 | 1.77E-02   | 1.14E-01 |
| 335                            | 5.43E-01                                | 1.20E-01 | 1.20E-01 | 7.43E-02 | 5.43E-01          | 1.34E-01 | 1.20E-01 | 7.43E-02   | 5.43E-01 |
| 340                            | 3.14E-01                                | 1.20E-01 | 1.20E-01 | 1.78E-01 | 3.14E-01          | 2.81E-01 | 1.20E-01 | 1.78E-01   | 3.14E-01 |
| 345                            | 2.13E-01                                | 1.20E-01 | 1.20E-01 | 1.78E-01 | 2.13E-01          | 2.81E-01 | 1.20E-01 | 1.78E-01   | 2.13E-01 |
| 375                            | 1.44E-01                                | 3.18E-01 | 3.18E-01 | 1.38E-01 | 1.44E-01          | 6.09E-01 | 3.18E-01 | 1.38E-01   | 1.44E-01 |
| 380                            | 1.73E-01                                | 1.48E-01 | 1.48E-01 | 1.38E-01 | 1.73E-01          | 1.17E-01 | 1.48E-01 | 1.38E-01   | 1.73E-01 |
| 425                            | 6.23E-01                                | 5.09E-01 | 5.09E-01 | 1.23E-01 | 6.23E-01          | 5.09E-01 | 5.09E-01 | 1.23E-01   | 6.23E-01 |
| 430                            | 2.05E-01                                | 1.48E-02 | 1.48E-02 | 1.66E-01 | 2.05E-01          | 2.09E-02 | 1.48E-02 | 1.66E-01   | 2.05E-01 |
| CHOO (C-CH=CHO                 |                                         |          |          |          | Endo-H            |          |          |            |          |
| P1                             | 1.2644E-06                              |          |          |          | TemperatureTarget | Pinv     | Endo-H   | LT         | Prekcalc |
| P2                             | 3.4796E-05                              |          |          |          | 2.02E+02          | 5.00     | 1.00E-01 | 1.00E-01   | 1.00E-01 |
| 220                            | 6.12E-06                                | 8.79E-07 | 8.79E-07 | 1.06E-01 | 6.12E-06          | 6.12E-06 | 8.79E-07 | 1.06E-01   | 6.12E-06 |
| 225                            | 5.14E-06                                | 4.73E-07 | 4.73E-07 | 1.06E-01 | 5.14E-06          | 1.26E-06 | 4.73E-07 | 1.06E-01   | 5.14E-06 |
| 230                            | 4.28E-06                                | 1.06E-07 | 1.06E-07 | 1.06E-01 | 4.28E-06          | 3.23E-06 | 1.06E-07 | 1.06E-01   | 4.28E-06 |
| 235                            | 1.83E-05                                | 4.73E-07 | 4.73E-07 | 1.38E-01 | 1.83E-05          | 2.46E-06 | 4.73E-07 | 1.38E-01   | 1.83E-05 |
| 237                            | 4.28E-06                                | 3.20E-07 | 3.20E-07 | 1.38E-01 | 4.28E-06          | 2.46E-06 | 3.20E-07 | 1.38E-01   | 4.28E-06 |
| 240                            | 2.93E-06                                | 2.93E-07 | 2.93E-07 | 1.06E-01 | 2.93E-06          | 1.06E-07 | 2.93E-07 | 1.06E-01   | 2.93E-06 |
| 245                            | 2.13E-05                                | 6.02E-07 | 6.02E-07 | 1.06E-01 | 2.13E-05          | 1.84E-07 | 6.02E-07 | 1.06E-01   | 2.13E-05 |
| 330                            | 1.14E-01                                | 1.20E-01 | 1.20E-01 | 1.77E-02 | 1.14E-01          | 4.13E-02 | 1.20E-01 | 1.77E-02   | 1.14E-01 |
| 335                            | 5.43E-01                                | 1.20E-01 | 1.20E-01 | 7.43E-02 | 5.43E-01          | 1.34E-01 | 1.20E-01 | 7.43E-02   | 5.43E-01 |
| 340                            | 3.14E-01                                | 1.20E-01 | 1.20E-01 | 1.78E-01 | 3.14E-01          | 2.81E-01 | 1.20E-01 | 1.78E-01   | 3.14E-01 |
| 345                            | 2.13E-01                                | 1.20E-01 | 1.20E-01 | 1.78E-01 | 2.13E-01          | 2.81E-01 | 1.20E-01 | 1.78E-01   | 2.13E-01 |
| 375                            | 1.44E-01                                | 3.18E-01 | 3.18E-01 | 1.38E-01 | 1.44E-01          | 6.09E-01 | 3.18E-01 | 1.38E-01</ |          |

## RO2 migration of $\alpha$ -OOH hydrogen atoms

1,5 Shift

|     |               |
|-----|---------------|
| T   | 1/5-1/4 shift |
| 200 | 4.606         |
| 208 | 3.333         |

| T   | 1,544-bit | T-dependence | Target   | Final    | 1000T | 1/T      | log(1/T)  | log()     | log(T)   | Replicate | 1,000T |
|-----|-----------|--------------|----------|----------|-------|----------|-----------|-----------|----------|-----------|--------|
| 200 | 4.60E-05  | 4.60E-05     | 4.60E-05 | 4.60E-05 | 5.00  | 5.00E-03 | -2.30E+00 | -4.34E+00 | 4.34E+00 | 1.32E-05  |        |
| 500 | 9.33E-04  | 9.33E-04     | 9.33E-04 | 9.33E-04 | 2.00  | 2.00E-01 | -1.30E+00 | -3.00E+00 | 3.00E+00 | 1.00E+01  |        |

|    |       |
|----|-------|
| P0 |       |
| P1 | 1.676 |
| P2 | 9.336 |

| P0 | 2        |           | 2                 |
|----|----------|-----------|-------------------|
| P1 | 1.87E+11 | 2.485E+11 | 2.33E+00 1.66E+00 |
| P2 | 0.33E+00 | 3.00E+00  | 2.70 2.88         |

|     |       |
|-----|-------|
| 400 | 7.17% |
| 425 | 2.95% |
| 450 | 9.79% |

[illegible]

|     |       |
|-----|-------|
| 200 | 1.138 |
| 210 | 1.228 |
| 220 | 1.328 |

[illegible]

|     |       |
|-----|-------|
| 280 | 6.594 |
| 290 | 1.888 |
| 300 | 0.633 |

[illegible]

## Average temperature de

| T   | 1,014-unit | T-dependencyTarget | Final    | 1000T | 1/T      | log(1/T)  | log()       | log(T)   | Replicate | 1,000-unit |
|-----|------------|--------------------|----------|-------|----------|-----------|-------------|----------|-----------|------------|
| 200 | 4.60E-05   | 4.60E-05           | 4.60E-05 | 5.00  | 5.00E-03 | -2.30E+00 | -4.34E+00 A | 1.32E-05 |           | 1.00E+01   |
| 224 | 3.23E-04   | 3.23E-04           | 3.23E-04 | 4.44  | 4.44E-03 | -2.35E+00 | -3.69E+00   | 2.07E+00 | 0.70      |            |

|                                            |         |                  |       |
|--------------------------------------------|---------|------------------|-------|
| $>\text{CHCO}_2$ , $ \text{-CH}_2\text{-}$ | R3<br>T | Miyoshi 2<br>200 | 7.228 |
|--------------------------------------------|---------|------------------|-------|

| CHOO | CH2      | T        | Myozi 2011 | Mohamed et al. 2018a | T-dependence Target | Fixed    | 1000T     | 1/T         | log(1/T) | log(CHOO)   log(T) | Replicate |
|------|----------|----------|------------|----------------------|---------------------|----------|-----------|-------------|----------|--------------------|-----------|
| 200  | 7.22E-12 | 1.71E-07 | 6.65E-06   | 7.54E-08             | 5.00                | 5.00E-03 | -2.30E+00 | -7.12E+00 A | 2.17E-08 |                    |           |

| $\text{>C(=O)-CH}_2\text{-T}$ | Myosin 2 |
|-------------------------------|----------|
| 200                           | 7.964    |
| 226                           | 1.364    |

[illegible]

### Scrambling -OOH hydrogen atoms

[illegible]



## File Q2004+

## RO2 migration of aldehydic hydrogen atoms

2.00 2.50 3.00 3.50 4.00 4.50 5.00 5.50
